# Supplementary material for: Six novel multicomponent systems of theobromine with carboxylic acids: crystallographic structures, solubility determination and DFT calculations
Source: Royal Society of Chemistry journal article supplement (doi:10.1039/d3ce00762f), 2023-01-01
Supplement: d3ce00762f1.pdf [file d3ce00762f1.pdf]

## Supporting Information

### Six novel multicomponent systems of theobromine with carboxylic acids: crystallographic structures, solubility determination and DFT calculations

Xin-Yue Yuan,<sup>a, b</sup> Yan Cheng,<sup>b</sup> Jun Liu,<sup>b</sup> Qi-Lei Sun,<sup>a, \*</sup> and Fu-Min Xue<sup>b, \*</sup>

<sup>a</sup> School of Material Science and Engineering, Shandong Jianzhu University, Jinan, 250101, P. R. China

<sup>b</sup> Shandong Analysis and Test Center, Qilu University of Technology (Shandong Academy of Sciences), Jinan, 250014, P. R. China

\*Corresponding author E-mail: [gileisun@163.com](mailto:gileisun@163.com), [xuefumin@qlu.edu.cn](mailto:xuefumin@qlu.edu.cn)

### Content

1. Supplementary table
2. Supplementary figure

Table S1. Detailed Information of the Chemicals

| chemicals                                | CAS        | molar mass (g·mol <sup>-1</sup> ) | source                                            | mass fraction purity (%) | analysis method   |
|------------------------------------------|------------|-----------------------------------|---------------------------------------------------|--------------------------|-------------------|
| Theobromine                              | 83-67-0    | 180.16                            | Shanghai Aladdin Biochemical Technology Co., Ltd. | ≥99                      | HPLC <sup>a</sup> |
| <i>p</i> -Coumaric                       | 7400-08-0  | 164.16                            | Shanghai Macklin Biochemical Co., Ltd.            | ≥99                      | HPLC <sup>a</sup> |
| 1-Hydroxy-2-naphthoic acid               | 86-48-6    | 188.18                            | Shanghai Macklin Biochemical Co., Ltd.            | ≥98                      | HPLC <sup>a</sup> |
| 2,4,6-Trihydroxybenzoic acid monohydrate | 71989-93-0 | 188.13                            | Shanghai Macklin Biochemical Co., Ltd.            | ≥98                      | HPLC <sup>a</sup> |
| Citric acid monohydrate                  | 5949-29-1  | 210.1388                          | Sinopharm Chemical Reagent Co., Ltd.              | ≥99.5                    | HPLC <sup>a</sup> |
| Gallic acid monohydrate                  | 5995-86-8  | 188.14                            | Tianjin Kermel Chemical Reagent Co., Ltd          | ≥99                      | HPLC <sup>a</sup> |
| methanol                                 | 67-56-1    | 32.04                             | Sinopharm Chemical Reagent Co., Ltd., China.      | ≥99.7                    | GC <sup>b</sup>   |
| ethanol                                  | 64-17-5    | 46.07                             | Sinopharm Chemical Reagent Co., Ltd., China.      | ≥99.7                    | GC <sup>b</sup>   |
| acetone                                  | 67-64-1    | 58.08                             | Sinopharm Chemical Reagent Co., Ltd., China.      | ≥99.7                    | GC <sup>b</sup>   |
| Acetonitrile                             | 75-05-8    | 41.05                             | Tianjin Fuyu Fine Chemical Co., Ltd.              | ≥99.5                    | GC <sup>b</sup>   |

<sup>a</sup> High-performance liquid chromatography. <sup>b</sup> Gas chromatography.

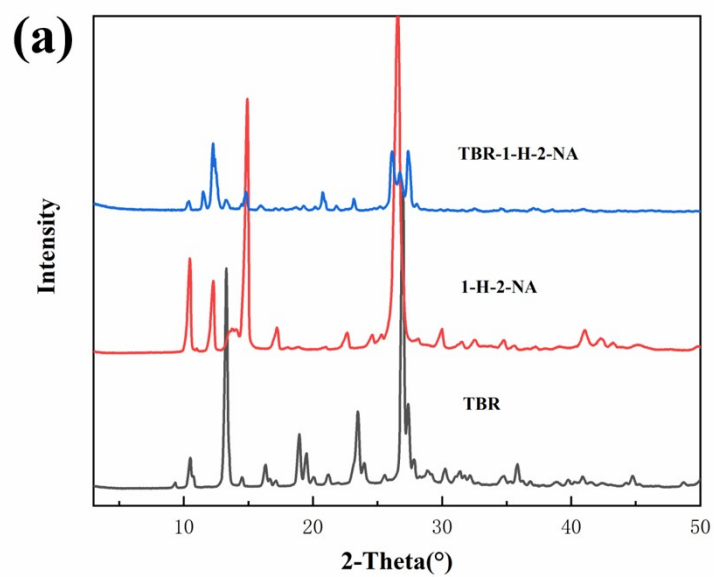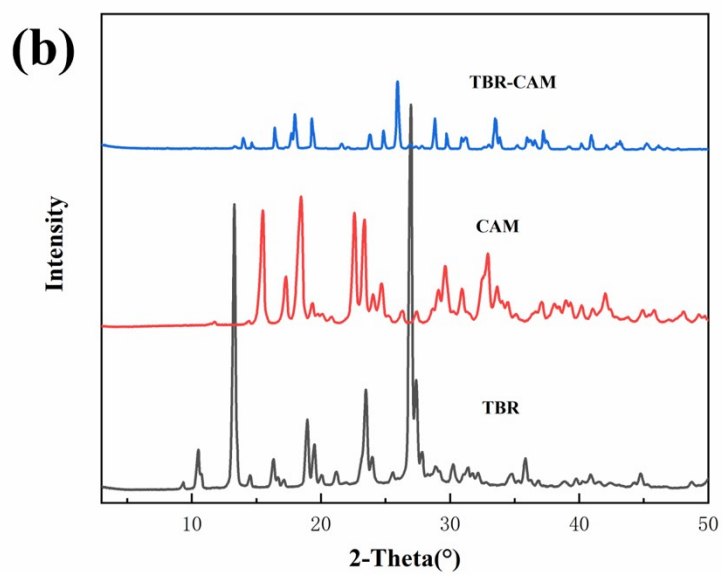

Fig. S1. Powder XRD patterns of the new cocrystals a) TBR-1-H-2-NA, b) TBR-CAM and their corresponding reactants.

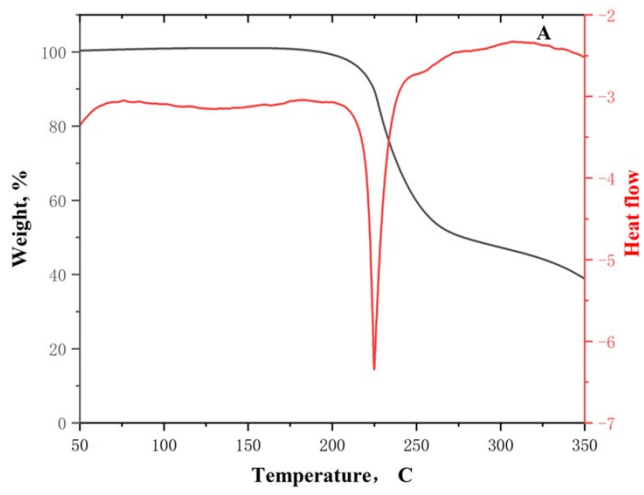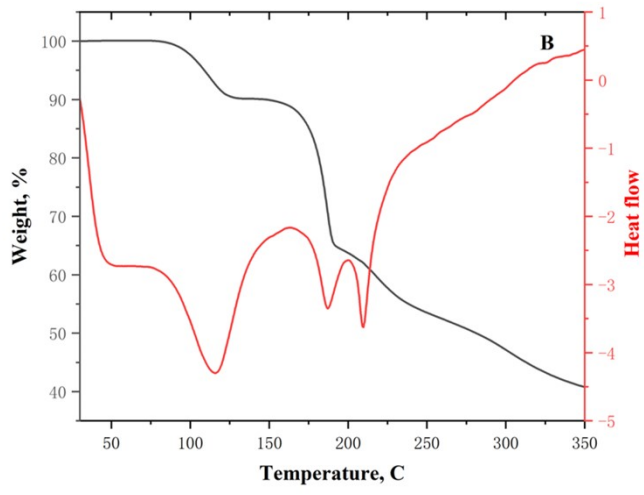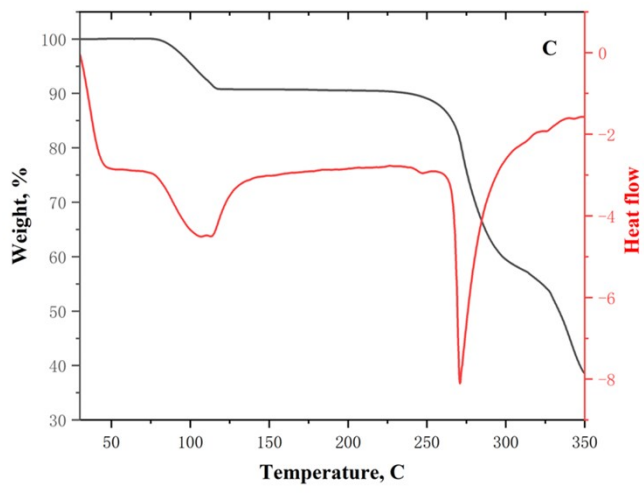

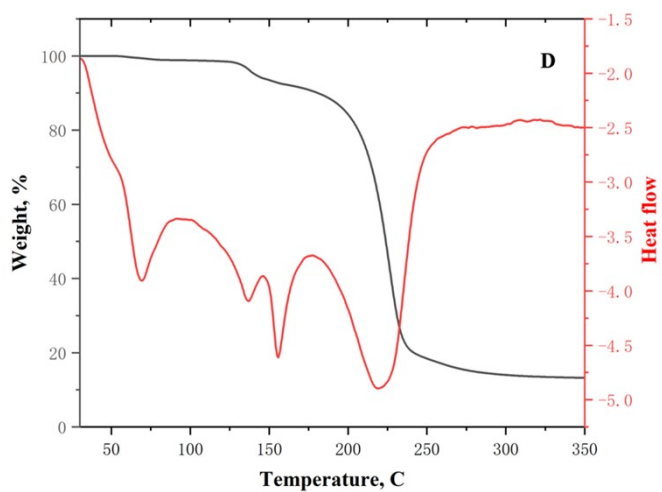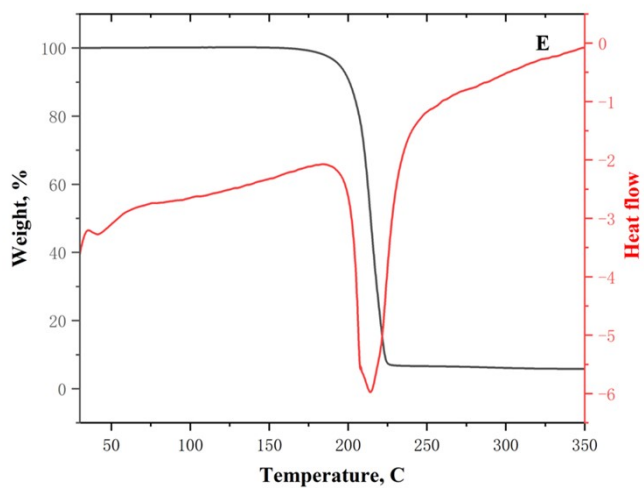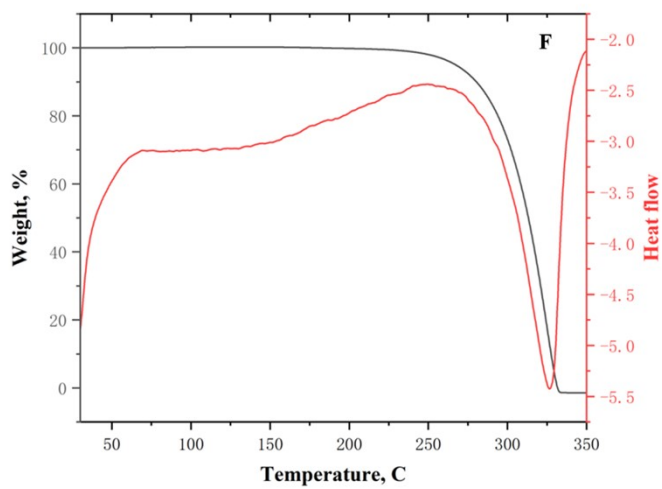

Fig. S2. DSC-TGA curves of (A) *p*-COA, (B) 2,4,6-TRM, (C) GAL, (D) CAM, (E) 1-H-2-NA, (F) TBR.

The TGA and DSC curves are shown in black and red, respectively.
